# Supplementary material for: Immunodeficiencies Push Readmissions in Malignant Tumor Patients: A Retrospective Cohort Study Based on the Nationwide Readmission Database
Source: MDPI journal article supplement (doi:10.3390/cancers15010088), 2022-12-23
Supplement: s1 [file s1]

**Supplemental Table S1. The International Classification of Diseases, Tenth Revision, Clinical Modification (ICD-10-CM) Codes used in our study.**

|                                   | Diseases                                                          | Codes                                                                                                                                                                                                                                                                                                                                                                                                                                          |
|-----------------------------------|-------------------------------------------------------------------|------------------------------------------------------------------------------------------------------------------------------------------------------------------------------------------------------------------------------------------------------------------------------------------------------------------------------------------------------------------------------------------------------------------------------------------------|
| <b>Primary Immunodeficiency</b>   | Immunodeficiencies affecting cellular and humoral immunity        | D810, D811, D812, D8131, D813, D8130, D8132, D8139, D816, D817, D819, D8189                                                                                                                                                                                                                                                                                                                                                                    |
|                                   | Combined immunodeficiencies with associated or syndromic features | D814, D815, D820, D821, D822, D824, D828, D829, D8481, D84821, D84822, D512                                                                                                                                                                                                                                                                                                                                                                    |
|                                   | Predominantly antibody deficiencies                               | D800, D801, D802, D803, D804, D805, D806, D807, D808, D809, D830, D831, D832, D838, D839                                                                                                                                                                                                                                                                                                                                                       |
|                                   | Diseases of immune dysregulation                                  | D823, D840, E70330,                                                                                                                                                                                                                                                                                                                                                                                                                            |
|                                   | Complement deficiencies                                           | D841                                                                                                                                                                                                                                                                                                                                                                                                                                           |
|                                   | Other immunodeficiencies                                          | D848, D8489, D849                                                                                                                                                                                                                                                                                                                                                                                                                              |
| <b>Secondary Immunodeficiency</b> | Acquired immune deficiency syndrome                               | B20, B9735, O98711, O98712, O98713, O98719, O9872, O9873                                                                                                                                                                                                                                                                                                                                                                                       |
| <b>Malignancy</b>                 | Bladder                                                           | C670- C679                                                                                                                                                                                                                                                                                                                                                                                                                                     |
|                                   | Brain & other nervous                                             | C700, C701, C709-C721, C7220-C7222, C7230-C7232, C7240-C7242, C7250, C7259, C729-                                                                                                                                                                                                                                                                                                                                                              |
|                                   | Breast                                                            | C50011, C50012, C50019, C50021, C50022, C50029, C50111, C50112, C50119, C50121, C50122, C50129, C50211, C50212, C50219, C50221, C50222, C50229, C50311, C50312, C50319, C50321, C50322, C50329, C50411, C50412, C50419, C50421, C50422, C50429, C50511, C50512, C50519, C50521, C50522, C50529, C50611, C50612, C50619, C50621, C50622, C50629, C50811, C50812, C50819, C50821, C50822, C50829, C50911, C50912, C50919, C50921, C50922, C50929 |
|                                   | Cervix                                                            | C530, C531, C538, C539                                                                                                                                                                                                                                                                                                                                                                                                                         |
|                                   | Colorectal                                                        | C180, C182- C189, C19, C20                                                                                                                                                                                                                                                                                                                                                                                                                     |
|                                   | Esophagus                                                         | C153- C155, C158, C159                                                                                                                                                                                                                                                                                                                                                                                                                         |
|                                   | Leukemia                                                          | C9100-C9102, C9110-C9112, C9130-C9132, C9140-C9142, C9150-C9152, C9160-C9162, C9190-C9192, C91A0-C91A2, C91Z0-C91Z2, C9200-C9202, C9210-C9212, C9220-C9222, C9240-C9242, C9250-C9252, C9260-C9262, C9290-C9292, C92A0-C92A2, C92Z0-C92Z2, C9300-C9302, C9310-C9312, C9330-C9332, C9390-C9392, C93Z0-C93Z2, C9400-C9402, C9420-C9422, C9430-C9432, C9440-C9442, C946, C9480-C9482, C9500- C9502, C9510-C9512, C9590-C9592                       |
|                                   | Liver                                                             | C220-C224, C227, C228                                                                                                                                                                                                                                                                                                                                                                                                                          |
|                                   | Lung                                                              | C3400-C3402, C3410-C3412, C342, C3430-C3432, C3480-C3482, C3490-C3492                                                                                                                                                                                                                                                                                                                                                                          |
|                                   | non-Hodgkin lymphoma                                              | C8200-C8269, C8280-C8299, C8300-C8319, C8330- C8339, C8350-C8359, C8370- C8399, C8400-C8419, C8440-C8449, C8460-C8479, C8490-C8499, C84A0-C84A, C84Z0-C84Z9, C8510- C8529, C8580-C8599, C860 -C866, C880, C882-C884, C888, C889                                                                                                                                                                                                                |
|                                   | Ovary                                                             | C561, C562, C569                                                                                                                                                                                                                                                                                                                                                                                                                               |
|                                   | Pancreas                                                          | C250-C254, C257- C259                                                                                                                                                                                                                                                                                                                                                                                                                          |

|                              |                                             |                                                                                                                                                                                                                                                                                                                                                                                                                                                                                                                                                                     |
|------------------------------|---------------------------------------------|---------------------------------------------------------------------------------------------------------------------------------------------------------------------------------------------------------------------------------------------------------------------------------------------------------------------------------------------------------------------------------------------------------------------------------------------------------------------------------------------------------------------------------------------------------------------|
|                              | Prostate                                    | C61                                                                                                                                                                                                                                                                                                                                                                                                                                                                                                                                                                 |
|                              | Stomach                                     | C160-C166, C168, C169                                                                                                                                                                                                                                                                                                                                                                                                                                                                                                                                               |
|                              | Thyroid                                     | C73                                                                                                                                                                                                                                                                                                                                                                                                                                                                                                                                                                 |
| <b>Readmitted<br/>causes</b> | Anemia                                      | D500, D501, D508-D513, D518-D521, D528-D532, D538, D539, D550-D553, D558-D565, D568, D569, D5700-D5703, D5709, D571, D5720, D57211-D57213, D57218, D57219, D573, D5740, D57411-D57413, D57418, D57419, D5742, D57431-D57433, D57438, D57439, D5744, D57451-D57453, D57458, D57459, D5780, D57811, D57812, D57813, D57818, D57819, D580, D581, D582, D588, D589, D590, D591, D5910, D5911-D5913, D5919, D592-D596, D598-D601, D608, D609, D6101, D6109, D611-D613, D61810, D61811, D61818, D6182, D6189, D619, D62, D630, D631, D638, D640-D644, D6481, D6489, D649, |
|                              | Chronic obstructive pulmonary disease, COPD | J410, J411, J418, J42, J430-J432, J438-J441, J449                                                                                                                                                                                                                                                                                                                                                                                                                                                                                                                   |
|                              | Fluid and electrolyte disorders             | E860, E861, E869-E876, E8770, E8771, E8779, E878                                                                                                                                                                                                                                                                                                                                                                                                                                                                                                                    |
|                              | Gastro-esophageal reflux disease            | K210, K2100, K2101, K219                                                                                                                                                                                                                                                                                                                                                                                                                                                                                                                                            |
|                              | Heart diseases                              | I200, I201, I208, I209, I2101, I2102, I2109, I2111, I2119, I2121, I2129, I213, I214, I219, I21A1, I21A9, I220-I222, I228, I229, I230-I241, I248, I249, I2510, I25110, I25111, I25118, I25119, I252, I253, I2541, I2542, I255, I256, I25700, I25701, I25708, I25709, I25710, I25711, I25718-I25721, I25728-I25731, I25738, I25739, I25750, I25751, I25758-I25761, I25768, I25769, I25790, I25791, I25798, I25799, I25810-I25812, I2582, I2583, I2584, I2589, I259                                                                                                    |
|                              | Infection                                   | A000-A499, A510-A99                                                                                                                                                                                                                                                                                                                                                                                                                                                                                                                                                 |
|                              | Kidney failure                              | N170-N172, N178, N179, N184-N186, N19                                                                                                                                                                                                                                                                                                                                                                                                                                                                                                                               |
|                              | Pneumonia                                   | J120-J123, J1281, J1282, J1289, J129, J13, J14, J150, J151, J1520, J15211, J15212, J1529, J153, J154, J155-J160, J168, J17, J180-J182, J188, J189                                                                                                                                                                                                                                                                                                                                                                                                                   |
|                              | Secondary malignancies                      | C770, C771, C772, C773, C774, C775, C778, C779, C7800, C7801, C7802, C781, C782, C7830, C7839, C784-C787, C7880, C7889, C7900, C7901, C7902, C7910, C7911, C7919, C792, C7931, C7932, C7940, C7949, C7951, C7952, C7960, C7961, C7962, C7970, C7971, C7972, C7981, C7982, C7989, C799                                                                                                                                                                                                                                                                               |
